# Supplementary material for: Long‐Term Exposure to Air Pollution, Road Traffic Noise, and Heart Failure Incidence: The Danish Nurse Cohort
Source: PubMed Central journal article supplement — J Am Heart Assoc. 2021 Oct 6;10(20):e021436. doi: 10.1161/JAHA.121.021436 (PMC8751865; doi:10.1161/jaha.121.021436), 2021-10-06
Supplement: JAH3-10-e021436-s001.pdf [file JAH3-10-e021436-s001.pdf]

# **Supplemental Material**

**Table S1. Descriptive statistics for the excluded and included participants in the Danish Nurse Cohort**

| Variables                                           | Total          | Excluded       | Included       | P-value |
|-----------------------------------------------------|----------------|----------------|----------------|---------|
|                                                     | N = 28,698     | N = 6,509      | N = 22,189     |         |
| Age, mean $\pm$ SD                                  | 53.9 $\pm$ 8.5 | 58.2 $\pm$ 9.7 | 52.6 $\pm$ 7.7 | <0.001  |
| HF cases, n (%)                                     | 768 (2.7)      | 284 (4.4)      | 484 (2.2)      | <0.001  |
| Marital status, n (%)                               |                |                |                | <0.001  |
| Married                                             | 19,871 (69.2)  | 4,215 (64.8)   | 15,656 (70.6)  |         |
| Separated                                           | 459 (1.6)      | 75 (1.2)       | 384 (1.7)      |         |
| Divorced                                            | 3,127 (10.9)   | 534 (8.2)      | 2,593 (11.7)   |         |
| Single                                              | 2,910 (10.1)   | 686 (10.5)     | 2,224 (10.0)   |         |
| Widowed                                             | 2,085 (7.3)    | 753 (11.6)     | 1,332 (6.0)    |         |
| Body mass index (kg/m <sup>2</sup> ), mean $\pm$ SD | 23.7 $\pm$ 3.5 | 23.7 $\pm$ 3.6 | 23.7 $\pm$ 3.5 | 0.354   |
| Body mass index (kg/m <sup>2</sup> ), n (%)         |                |                |                | <0.001  |
| Underweight (< 18.5)                                | 750 (2.6)      | 208 (3.2)      | 542 (2.4)      |         |
| Normal weight (18.5-25)                             | 19,467 (67.8)  | 4,101 (63.0)   | 15,366 (69.3)  |         |
| Overweight (25-30)                                  | 6,532 (22.8)   | 1,500 (23.0)   | 5,032 (22.7)   |         |
| Obese ( $\geq$ 30)                                  | 1,591 (5.5)    | 342 (5.3)      | 1,249 (5.6)    |         |
| Smoking status, n (%)                               |                |                |                | <0.001  |
| Never                                               | 9,428 (32.9)   | 1,704 (26.2)   | 7,724 (34.8)   |         |
| Former                                              | 8,485 (29.6)   | 1,750 (26.9)   | 6,735 (30.4)   |         |
| Current                                             | 9,825 (34.2)   | 2,095 (32.2)   | 7,730 (34.8)   |         |
| Alcohol consumption, n (%)                          |                |                |                | <0.001  |
| None (0 drinks/week)                                | 4,589 (16.0)   | 1,244 (19.1)   | 3,345 (15.1)   |         |
| Moderate (1-15 drinks/week)                         | 16,965 (59.1)  | 3,239 (49.8)   | 13,726 (61.9)  |         |
| Heavy (> 15 drinks/week)                            | 6,285 (21.9)   | 1,167 (17.9)   | 5,118 (23.1)   |         |
| Physical activity, n (%)                            |                |                |                | <0.001  |
| Low                                                 | 2,044 (7.1)    | 599 (9.2)      | 1,445 (6.5)    |         |
| Medium                                              | 18,801 (65.5)  | 3,999 (61.4)   | 14,802 (66.7)  |         |
| High                                                | 7,496 (26.1)   | 1,554 (23.9)   | 5,942 (26.8)   |         |

|                                                                        |                  |                  |                  |        |
|------------------------------------------------------------------------|------------------|------------------|------------------|--------|
| Diagnosis or medication - Hypertension, n (%)                          |                  |                  |                  | <0.001 |
| No                                                                     | 24,756 (86.3)    | 5,344 (82.1)     | 19,412 (87.5)    |        |
| Yes                                                                    | 3,899 (13.6)     | 1,149 (17.7)     | 2,750 (12.4)     |        |
| Diagnosis or medication - Diabetes, n (%)                              |                  |                  |                  | <0.001 |
| No                                                                     | 28,065 (97.8)    | 6,298 (96.8)     | 21,767 (98.1)    |        |
| Yes                                                                    | 374 (1.3)        | 117 (1.8)        | 257 (1.2)        |        |
| Hormone therapy use, n (%)                                             |                  |                  |                  | <0.001 |
| Never                                                                  | 20,334 (70.9)    | 4,064 (62.4)     | 16,270 (73.3)    |        |
| Past                                                                   | 2,947 (10.3)     | 811 (12.5)       | 2,136 (9.6)      |        |
| Current                                                                | 4,914 (17.1)     | 1,131 (17.4)     | 3,783 (17.0)     |        |
| Oral contraceptive use, n (%)                                          |                  |                  |                  | <0.001 |
| Never                                                                  | 12,332 (43.0)    | 3,663 (56.3)     | 8,669 (39.1)     |        |
| Ever                                                                   | 16,188 (56.4)    | 2,668 (41.0)     | 13,520 (60.9)    |        |
| Employment status, n (%)                                               |                  |                  |                  | <0.001 |
| Actively working                                                       | 21,231 (74.0)    | 3,330 (51.2)     | 17,901 (80.7)    |        |
| Home-maker                                                             | 525 (1.8)        | 146 (2.2)        | 379 (1.7)        |        |
| Retired                                                                | 5,841 (20.4)     | 2,259 (34.7)     | 3,582 (16.1)     |        |
| Unemployed/rehabilitation                                              | 192 (0.7)        | 50 (0.8)         | 142 (0.6)        |        |
| Other                                                                  | 241 (0.8)        | 56 (0.9)         | 185 (0.8)        |        |
| Urbanization level, n (%)                                              |                  |                  |                  | 0.821  |
| Urban                                                                  | 8,827 (30.8)     | 2,000 (30.7)     | 6,827 (30.8)     |        |
| Suburban                                                               | 6,606 (23.0)     | 1,512 (23.2)     | 5,094 (23.0)     |        |
| Rural                                                                  | 13,248 (46.2)    | 2,980 (45.8)     | 10,268 (46.3)    |        |
| Average municipality income (1,000 Danish Kroner (DKK), mean $\pm$ SD) | 158.8 $\pm$ 22.0 | 158.8 $\pm$ 22.0 | 160.6 $\pm$ 24.0 | 0.999  |

P-value for the difference between excluded versus included participants (chi-square test for categorical variables and t-test for continuous variables)

**Table S2. Distribution of 1- and 23- year running means of air pollutants and road traffic noise at the cohort baseline in 1993 or 1999 and Spearman's rank correlation coefficients ( $\rho$ ) between the exposure levels**

|                                                 | Runnin<br>g mean<br>year(s) | Mean $\pm$<br>SD | Interquar<br>tile<br>Range | Percentile      |                  |                  |                  |                  | Spearman's rank<br>correlation<br>coefficients ( $\rho$ ) |                 |
|-------------------------------------------------|-----------------------------|------------------|----------------------------|-----------------|------------------|------------------|------------------|------------------|-----------------------------------------------------------|-----------------|
|                                                 |                             |                  |                            | 5 <sup>th</sup> | 25 <sup>th</sup> | 50 <sup>th</sup> | 75 <sup>th</sup> | 95 <sup>th</sup> | PM <sub>2.5</sub>                                         | NO <sub>2</sub> |
| PM <sub>2.5</sub> ,<br>$\mu\text{g}/\text{m}^3$ | 1                           | 19.4 $\pm$ 3.9   | 6.0                        | 13.0            | 16.6             | 19.2             | 22.5             | 25.2             |                                                           |                 |
|                                                 | 23                          | 21.7 $\pm$ 3.1   | 4.5                        | 16.8            | 19.3             | 21.8             | 23.8             | 26.5             |                                                           |                 |
| NO <sub>2</sub> ,<br>$\mu\text{g}/\text{m}^3$   | 1                           | 12.9 $\pm$ 8.0   | 8.2                        | 5.4             | 7.8              | 10.5             | 16.0             | 27.4             | 0.50                                                      |                 |
|                                                 | 23                          | 12.4 $\pm$ 6.5   | 7.5                        | 5.5             | 8.0              | 10.7             | 15.5             | 23.7             | -                                                         |                 |
| L <sub>den</sub> , dB                           | 1                           | 52.7 $\pm$ 8.1   | 9.4                        | 37.0            | 48.6             | 53.1             | 58.0             | 64.9             | 0.32                                                      | 0.61            |
|                                                 | 23                          | 52.2 $\pm$ 6.8   | 7.7                        | 39.9            | 48.9             | 52.7             | 56.6             | 62.0             | -                                                         | 0.61            |

PM<sub>2.5</sub>: particulate matter with a diameter < 2.5  $\mu\text{m}$  (23-year running means are not available); NO<sub>2</sub>: nitrogen dioxide; L<sub>den</sub>: 24-hour weighted average road traffic noise level

**Table S3. Mean exposure levels at cohort entry (1993 or 1999) by heart failure (HF) status, mean  $\pm$  standard deviation**

| Exposure                                        | Running<br>mean year(s) | Total<br>N = 22,189 | No incident<br>HF<br>N = 21,705 | Incident HF<br>N = 484 | P-value <sup>§</sup> |
|-------------------------------------------------|-------------------------|---------------------|---------------------------------|------------------------|----------------------|
| PM <sub>2.5</sub> ,<br>$\mu\text{g}/\text{m}^3$ | 1                       | 19.4 $\pm$ 3.9      | 19.3 $\pm$ 3.9                  | 21.5 $\pm$ 3.7         | <0.001               |
|                                                 | 3                       | 21.0 $\pm$ 3.5      | 21.0 $\pm$ 3.5                  | 22.7 $\pm$ 3.5         | <0.001               |
|                                                 | 23                      | 21.7 $\pm$ 3.1      | 21.7 $\pm$ 3.1                  | 23.0 $\pm$ 3.3         | <0.001               |
| NO <sub>2</sub> ,<br>$\mu\text{g}/\text{m}^3$   | 1                       | 12.9 $\pm$ 8.0      | 12.9 $\pm$ 7.9                  | 14.4 $\pm$ 9.8         | <0.001               |
|                                                 | 3                       | 13.5 $\pm$ 8.1      | 13.5 $\pm$ 8.1                  | 15.1 $\pm$ 10.1        | <0.001               |
|                                                 | 23                      | 12.4 $\pm$ 6.5      | 12.4 $\pm$ 6.4                  | 13.4 $\pm$ 7.8         | 0.004                |
| L <sub>den</sub> , dB                           | 1                       | 52.7 $\pm$ 8.1      | 52.6 $\pm$ 8.1                  | 54.2 $\pm$ 7.9         | <0.001               |
|                                                 | 3                       | 52.6 $\pm$ 8.0      | 52.6 $\pm$ 8.0                  | 54.2 $\pm$ 7.9         | <0.001               |
|                                                 | 23                      | 52.2 $\pm$ 6.8      | 52.2 $\pm$ 6.8                  | 53.2 $\pm$ 7.1         | 0.002                |

PM<sub>2.5</sub>: particulate matter with a diameter < 2.5  $\mu\text{m}$ ; NO<sub>2</sub>: nitrogen dioxide; L<sub>den</sub>: 24-hour weighted average road traffic noise level

<sup>§</sup>P-value for differences of exposure levels by HF status (incident versus no incident HF)

**Table S4. Hazard ratios of incident heart failure (HF) associated with an interquartile range (IQR) increase in three-year mean exposures to PM<sub>2.5</sub>, NO<sub>2</sub>, and L<sub>den</sub> in the Danish Nurse Cohort (N = 22,189): with adjustment of calendar year**

| Exposure          | Crude model        | Fully adjusted model | Two-pollutant model         |                           |                            | Three-pollutant model                                                   |
|-------------------|--------------------|----------------------|-----------------------------|---------------------------|----------------------------|-------------------------------------------------------------------------|
|                   | Model 1            | Model 2              | Model 2 + PM <sub>2.5</sub> | Model 2 + NO <sub>2</sub> | Model 2 + L <sub>den</sub> | Model 2 +<br>PM <sub>2.5</sub> , NO <sub>2</sub> , and L <sub>den</sub> |
|                   | HR (95% CI)        | HR (95% CI)          | HR (95% CI)                 | HR (95% CI)               | HR (95% CI)                | HR (95% CI)                                                             |
| PM <sub>2.5</sub> | 1.45 (1.19, 1.76)* | 1.35 (1.09, 1.67)*   | -                           | 1.44 (1.06, 1.95)*        | 1.30 (1.04, 1.64)*         | 1.44 (1.06, 1.96)*                                                      |
| NO <sub>2</sub>   | 1.15 (1.05, 1.26)* | 1.09 (0.98, 1.22)    | 0.96 (0.82, 1.12)           | -                         | 1.05 (0.92, 1.20)          | 0.92 (0.77, 1.09)                                                       |
| L <sub>den</sub>  | 1.18 (1.05, 1.32)* | 1.11 (0.99, 1.26)#   | 1.05 (0.93, 1.20)           | 1.08 (0.94, 1.25)         | -                          | 1.09 (0.94, 1.25)                                                       |

PM<sub>2.5</sub>: particulate matter with a diameter < 2.5 µm (IQR: 5.1 µg/m<sup>3</sup>); NO<sub>2</sub>: nitrogen dioxide (IQR: 8.6 µg/m<sup>3</sup>); L<sub>den</sub>: 24-hour weighted average road traffic noise level (9.3 dB)

Model 1 adjusting for age (underlying time), a strata term of year of cohort entry (1993/1999), and a penalty spline term of calendar year

Model 2 adjusting for individual- and area-level covariates in addition to the covariates in Model 1

\*: P-value < 0.05; #: P-value < 0.1

**Table S5. Inverse probability weight (IPW)-adjusted hazard ratios of incident heart failure associated with an interquartile range (IQR) increase in 3-year exposure to air pollution and road traffic noise in the Danish Nurse Cohort study (N = 22,189)**

| Exposure          | Crude model        | Fully adjusted model | Two-pollutant model         |                           |                            | Three-pollutant model                                                |
|-------------------|--------------------|----------------------|-----------------------------|---------------------------|----------------------------|----------------------------------------------------------------------|
|                   | Model 1            | Model 2              | Model 2 + PM <sub>2.5</sub> | Model 2 + NO <sub>2</sub> | Model 2 + L <sub>den</sub> | Model 2 + PM <sub>2.5</sub> , NO <sub>2</sub> , and L <sub>den</sub> |
|                   | HR (95% CI)        | HR (95% CI)          | HR (95% CI)                 | HR (95% CI)               | HR (95% CI)                | HR (95% CI)                                                          |
| PM <sub>2.5</sub> | 1.36 (1.22, 1.50)* | 1.18 (1.05, 1.33)*   | -                           | 1.15 (0.99, 1.34)         | 1.15 (1.02, 1.30)#         | 1.17 (1.00, 1.36)                                                    |
| NO <sub>2</sub>   | 1.17 (1.09, 1.26)* | 1.10 (1.01, 1.19)#   | 1.03 (0.92, 1.15)           | -                         | 1.05 (0.95, 1.17)          | 0.98 (0.86, 1.11)                                                    |
| L <sub>den</sub>  | 1.18 (1.08, 1.30)* | 1.12 (1.02, 1.24)#   | 1.09 (0.98, 1.21)           | 1.09 (0.97, 1.23)         | -                          | 1.10 (0.98, 1.24)                                                    |

PM<sub>2.5</sub>: particulate matter with a diameter < 2.5 µm (IQR: 5.1 µg/m<sup>3</sup>); NO<sub>2</sub>: nitrogen dioxide (IQR: 8.6 µg/m<sup>3</sup>); L<sub>den</sub>: 24-hour weighted average road traffic noise level (9.3 dB)

Model 1 adjusting for age (underlying time) and a strata term of year of cohort entry (1993/1999)

Model 2 adjusting for individual- and area-level covariates in addition to the covariates in Model 1

\*: P-value < 0.05; #: P-value < 0.1

**Table S6. Hazard ratios of incident heart failure associated with an interquartile range (IQR) increase in 1- or 23-year exposure to air pollution and road traffic noise in the Danish Nurse Cohort study (N = 22,189)**

|          |                   | Crude model        | Fully adjusted model | Two-pollutant model         |                           |                            | Three-pollutant model                                      |
|----------|-------------------|--------------------|----------------------|-----------------------------|---------------------------|----------------------------|------------------------------------------------------------|
|          |                   | Model 1            | Model 2              | Model 2 + PM <sub>2.5</sub> | Model 2 + NO <sub>2</sub> | Model 2 + L <sub>den</sub> | Model 2 +                                                  |
|          |                   |                    |                      |                             |                           |                            | PM <sub>2.5</sub> , NO <sub>2</sub> , and L <sub>den</sub> |
| Exposure |                   | HR (95% CI)        | HR (95% CI)          | HR (95% CI)                 | HR (95% CI)               | HR (95% CI)                | HR (95% CI)                                                |
| 1-year   | PM <sub>2.5</sub> | 1.33 (1.15, 1.53)* | 1.12 (0.95, 1.32)    | -                           | 1.07 (0.88, 1.30)         | 1.09 (0.92, 1.28)          | 1.08 (0.89, 1.33)                                          |
|          | NO <sub>2</sub>   | 1.16 (1.07, 1.27)* | 1.08 (0.98, 1.20)    | 1.06 (0.93, 1.20)           | -                         | 1.04 (0.92, 1.17)          | 1.00 (0.86, 1.16)                                          |
|          | L <sub>den</sub>  | 1.19 (1.06, 1.33)* | 1.12 (0.99, 1.27)#   | 1.11 (0.98, 1.25)           | 1.10 (0.95, 1.27)         | -                          | 1.11 (0.96, 1.28)                                          |
| 23-year  | PM <sub>2.5</sub> | -                  | -                    | -                           | -                         | -                          | -                                                          |
|          | NO <sub>2</sub>   | 1.14 (1.05, 1.23)* | 1.07 (0.97, 1.18)    | 0.95 (0.83, 1.08)           | -                         | 1.02 (0.91, 1.15)          | 0.90 (0.78, 1.04)                                          |
|          | L <sub>den</sub>  | 1.17 (1.06, 1.30)* | 1.12 (1.00, 1.25)#   | 1.06 (0.94, 1.19)           | 1.10 (0.96, 1.25)         | -                          | 1.11 (0.97, 1.26)                                          |

PM<sub>2.5</sub>: particulate matter with a diameter < 2.5 µm (IQR: 6.0 µg/m<sup>3</sup>); NO<sub>2</sub>: nitrogen dioxide (IQR: 8.2 and 7.5 µg/m<sup>3</sup> for 1- and 23-year running means); L<sub>den</sub>: 24-hour weighted average road traffic noise level (IQR: 9.3 and 7.7.dB 1- and 23-year running means)

-: no results; \*: P-value < 0.05; #: P-value < 0.1

Model 1 adjusting for age (underlying time) and a strata term of year of cohort entry (1993/1999)

Model 2 adjusting for individual- and area-level covariates in addition to the covariates in Model 1

Model 3 adjusting for a 3- year running mean of PM<sub>2.5</sub>, NO<sub>2</sub>, or L<sub>den</sub> in addition to the covariates in Model 2

\*: P-value < 0.05



**Table S7. Multiplicative effect modification of single- and two-co-exposures on the association between three-year exposure to PM<sub>2.5</sub> and incident heart failure**

| Co-exposure                       | Level                                        | Hazard ratio<br>(95% Confidence intervals)<br>per IQR (5.1 µg/m <sup>3</sup> ) increase in PM <sub>2.5</sub> | P-value <sup>§</sup> |
|-----------------------------------|----------------------------------------------|--------------------------------------------------------------------------------------------------------------|----------------------|
| <b>Single co-exposure</b>         |                                              |                                                                                                              |                      |
| NO <sub>2</sub>                   | Low                                          | 1.20 (0.96, 1.50)                                                                                            | 0.45                 |
|                                   | High                                         | 1.04 (0.80, 1.36)                                                                                            |                      |
| L <sub>den</sub>                  | Low                                          | 1.12 (0.91, 1.38)                                                                                            | 0.83                 |
|                                   | High                                         | 1.13 (0.90, 1.42)                                                                                            |                      |
| <b>Two co-exposure</b>            |                                              |                                                                                                              |                      |
| NO <sub>2</sub> ×L <sub>den</sub> | Low NO <sub>2</sub> – Low L <sub>den</sub>   | 1.10 (0.86, 1.40)                                                                                            | 0.43                 |
|                                   | Low NO <sub>2</sub> – High L <sub>den</sub>  | 2.10 (1.19, 3.68)*                                                                                           |                      |
|                                   | High NO <sub>2</sub> – Low L <sub>den</sub>  | 1.05 (0.56, 1.95)                                                                                            |                      |
|                                   | High NO <sub>2</sub> – High L <sub>den</sub> | 1.06 (0.79, 1.43)                                                                                            |                      |

Model adjusting for age (underlying time), a strata term of year of cohort entry (1993/1999), and individual- and area-level covariates

Low and high categories were determined based on the cutoff level of 75% (NO<sub>2</sub>: 16.8 µg/m<sup>3</sup>; L<sub>den</sub>: 57.8 dB)

<sup>§</sup> difference of estimates between subgroups; \*: P-value < 0.05

**Table S8. Risk of heart failure (HF) associated with multiple exposures to PM<sub>2.5</sub>, NO<sub>2</sub>, and L<sub>den</sub>**

| Cutoff level | Exposure to 3-year running mean of PM <sub>2.5</sub> , NO <sub>2</sub> , and L <sub>den</sub> | Person-years | Incident HF | Hazard ratio (95% confidence intervals) |
|--------------|-----------------------------------------------------------------------------------------------|--------------|-------------|-----------------------------------------|
| 25%          | Low-low-low                                                                                   | 31,623       | 29          | 1.00 (reference)                        |
|              | One or two high                                                                               | 153,222      | 172         | 1.20 (0.80, 1.78)                       |
|              | High-high-high                                                                                | 223,932      | 283         | 1.33 (0.89, 1.99)                       |
| 50%          | Low-low-low                                                                                   | 101,993      | 105         | 1.00 (reference)                        |
|              | One or two high                                                                               | 202,169      | 236         | 1.12 (0.88, 1.42)                       |
|              | High-high-high                                                                                | 104,615      | 143         | 1.32 (0.98, 1.77) <sup>#</sup>          |
| 75%          | Low-low-low                                                                                   | 223,309      | 244         | 1.00 (reference)                        |
|              | One or two high                                                                               | 153,485      | 188         | 1.15 (0.94, 1.41)                       |
|              | High-high-high                                                                                | 31,983       | 52          | 1.43 (1.02, 1.99) <sup>*</sup>          |

PM<sub>2.5</sub>: particulate matter with a diameter < 2.5 μm; NO<sub>2</sub>: nitrogen dioxide; L<sub>den</sub>: 24-hour weighted average road traffic noise level

Models adjusting for age (underlying time), a strata term of year of cohort entry (1993/1999), and individual- and area-level covariates.

Low and high categories were determined based on the various cutoff levels for 25% (PM<sub>2.5</sub>: 18.5 μg/m<sup>3</sup>; NO<sub>2</sub>: 8.2 μg/m<sup>3</sup>; L<sub>den</sub>: 48.6 dB); 50% (PM<sub>2.5</sub>: 20.8 μg/m<sup>3</sup>; NO<sub>2</sub>: 11.1 μg/m<sup>3</sup>; L<sub>den</sub>: 53.0 dB); and 75% (PM<sub>2.5</sub>: 23.6 μg/m<sup>3</sup>; NO<sub>2</sub>: 16.8 μg/m<sup>3</sup>; L<sub>den</sub>: 57.8 dB)

\*: P-value < 0.05; #: P-value < 0.1

**Table S9. Effect modification on the association between three-year exposure to PM<sub>2.5</sub> and incident heart failure (HF) in the Danish Nurse Cohort study (N = 22,189)**

|                                  | Effect modifiers                  | Hazard ratio (95% confidence intervals) per 5.1 µg/m <sup>3</sup> in PM <sub>2.5</sub> | P-value <sup>§</sup> |
|----------------------------------|-----------------------------------|----------------------------------------------------------------------------------------|----------------------|
| Age at baseline                  | < 65 years                        | 1.21 (0.93, 1.57)                                                                      | 0.89                 |
|                                  | ≥ 65 years                        | 1.43 (1.05, 1.93) *                                                                    |                      |
| Obesity (<30 kg/m <sup>2</sup> ) | No                                | 1.16 (0.95, 1.42)                                                                      | 0.07                 |
|                                  | Yes                               | 1.29 (0.77, 2.15)                                                                      |                      |
| Smoking                          | Never                             | 1.04 (0.73, 1.49)                                                                      | 0.04                 |
|                                  | Former                            | 1.72 (1.25, 2.36) *                                                                    |                      |
|                                  | Current                           | 0.96 (0.72, 1.29)                                                                      |                      |
| Alcohol consumption              | Never (0 drinks per week)         | 0.97 (0.67, 1.41)                                                                      | 0.72                 |
|                                  | Moderate (1 - 14 drinks per week) | 1.21 (0.95, 1.56)                                                                      |                      |
|                                  | Heavy (> 15 drinks per week)      | 1.34 (0.90, 2.00)                                                                      |                      |
| Physical activity                | Low                               | 1.08 (0.67, 1.72)                                                                      | 0.70                 |
|                                  | Medium                            | 1.23 (0.99, 1.54) #                                                                    |                      |
|                                  | High                              | 1.12 (0.68, 1.84)                                                                      |                      |
| Shift work                       | Day                               | 1.12 (0.75, 1.67)                                                                      | 0.34                 |
|                                  | Evening                           | 1.25 (0.59, 2.64)                                                                      |                      |
|                                  | Night                             | 2.20 (0.97, 4.97) #                                                                    |                      |
|                                  | Rotating                          | 0.81 (0.32, 2.08)                                                                      |                      |
| Hypertension                     | No                                | 1.01 (0.81, 1.28)                                                                      | 0.02                 |
|                                  | Yes                               | 1.41 (1.02, 1.93) *                                                                    |                      |
| Diabetes                         | No                                | 1.14 (0.94, 1.38)                                                                      | 0.29                 |
|                                  | Yes                               | 1.52 (0.74, 3.12)                                                                      |                      |
| Urbanicity                       | Urban                             | 1.27 (0.97, 1.67) #                                                                    | 0.07                 |
|                                  | Suburban                          | 0.86 (0.51, 1.44)                                                                      |                      |
|                                  | Rural                             | 1.12 (0.83, 1.50)                                                                      |                      |

PM<sub>2.5</sub>: particulate matter with a diameter < 2.5 µm; NO<sub>2</sub>

Models adjusting for age (underlying time), a strata term of year of cohort entry (1993/1999), individual- and area-level covariates, and a 3-year running mean of L<sub>den</sub>

<sup>§</sup>Difference of estimates between subgroups; \*: P-value < 0.05; #: P-value < 0.05

**Table S10. Previous studies on the association between long-term exposure to PM<sub>2.5</sub>, NO<sub>2</sub>, and road traffic noise and heart failure**

| Author (year)           | Cohort/study, area, study period, and N                                                            | Disease definition                                    | Exposure  |                                              |                   |                                             | Hazard ratios (95% Confidence intervals) |                                             |                   |
|-------------------------|----------------------------------------------------------------------------------------------------|-------------------------------------------------------|-----------|----------------------------------------------|-------------------|---------------------------------------------|------------------------------------------|---------------------------------------------|-------------------|
|                         |                                                                                                    |                                                       | Period    | Window                                       | Variable §        | Mean (5-95th percentile)                    | Adj†                                     | Published                                   | Per unit ¶        |
| <b>Mortality</b>        |                                                                                                    |                                                       |           |                                              |                   |                                             |                                          |                                             |                   |
| Beelen et al. (2009)    | Netherlands Cohort Study on Diet and Cancer, the Netherlands, 1987-1996, N=120,852                 | ICD-9: 428; ICD-10: I50                               | 1987-1996 | 10-year mean (1987-1996)                     | PM <sub>2.5</sub> | -                                           | -                                        | 2.69 (1.37-5.27) per 10 µg/m <sup>3</sup>   | 1.66 (1.18-2.33)  |
| <b>Incidence</b>        |                                                                                                    |                                                       |           |                                              |                   |                                             |                                          |                                             |                   |
| Atkinson et al. (2013)  | UK general practices cohort, UK, 2003-2007, N=810,188                                              | ICD-10: I50                                           | 2002-2006 | Previous year's annual mean                  | PM <sub>2.5</sub> | 12.9 (SD: 1.4; min: 7.2; max: 20.2) in 2002 | -                                        | 1.06 (1.01-1.11) per 1.9 µg/m <sup>3</sup>  | 1.17 (1.03-1.32)  |
|                         |                                                                                                    |                                                       |           |                                              | NO <sub>2</sub>   | 22.5 (SD: 7.4; min: 1.7; max: 60.8)         | -                                        | 1.06 (1.01-1.11) per 10.7 µg/m <sup>3</sup> | 1.05 (1.01-1.09)  |
| To et al. (2015)        | Canadian National Breast Screening Study, Canada, 1992-2013, N=29,549                              | ICD-9: 428; ICD-10: I500, I501, I509                  | 1998-2006 | 9-year mean (1998-2006)                      | PM <sub>2.5</sub> | 12.47 (SD: 2.40)                            | -                                        | 1.30 (1.11-1.52) per 10 µg/m <sup>3</sup>   | 1.14 (1.06-1.24)  |
| Carey et al. (2016)     | Greater London general practices cohort, UK, 2005-2011, N=209,215                                  | ICD-10: I50                                           | 2004      | 1-year road traffic PM <sub>2.5</sub> (2004) | PM <sub>2.5</sub> | 1.45 (SD: 0.52)                             | -                                        | 1.15 (1.02-1.30) per 1 µg/m <sup>3</sup>    | 2.04 (1.09-3.81)  |
| Seidler et al. (2016)   | Administrative cohort in Rhine-Main area of Germany, 2005-2010, N=654,172 control and 70,012 cases | ICD-10: I50                                           | 2005      | Annual mean                                  | Noise             | (min: 40; max: 70)                          | -                                        | 1.01 (1.00-1.02) per 10 dB                  | 1.01 (1.00-1.02)  |
| Stockfelt et al. (2017) | The Primary Prevention Study, Sweden, 1990-2011, N=5,850                                           | ICD-9: 428; ICD-10: I50, I11.0                        | 1990-2011 | 5-year moving average                        | PM <sub>2.5</sub> | Median 9.3 (min: 6.3; max: 12)              | -                                        | 1.49 (1.07-2.10) per 5 µg/m <sup>3</sup>    | 1.50 (1.06-2.13)  |
|                         | The GOT-MONICA cohort, Sweden, 1990-2011, N=4,500                                                  | ICD-9: 428; ICD-10: I50, I11.0                        | 1990-2011 | 5-year moving average                        | PM <sub>2.5</sub> | Median: 8.5 (min: 5.6; max: 12)             | -                                        | 0.50 (0.21-1.17) per 5 µg/m <sup>3</sup>    | 0.49 (0.21-1.17)  |
| Kim et al. (2017)       | National Health Insurance Service – National Sample Cohort, 2007-2013, N=136,094                   | ICD-10: I11.0, I13.0, I13.2, I25.5, I42, I50, O90.3   | 2007-2013 | 7-year moving average                        | PM <sub>2.5</sub> | 25.0 (SD: 14.3; min: 2.8; max: 121.2)       | -                                        | 1.44 (1.29-1.61) per 1 µg/m <sup>3</sup>    | 6.42 (3.63-11.35) |
|                         |                                                                                                    |                                                       |           |                                              | NO <sub>2</sub>   | 34.5 (SD: 12.9; min: 6.4; max: 92.4)        | -                                        | 2.40 (2.02-2.85) per 18.4 ppb               | 1.62 (1.47-1.78)  |
| Sørensen et al. (2017)  | Danish Diet, Cancer, and Health cohort, 1993-2011, N=50,954                                        | ICD-8: 427.0, 427.1; ICD-10: I50, I11.0, I42.0, I42.9 | 1993-2011 |                                              | NO <sub>2</sub>   | 15.7 (12.2-33.5)                            | Noise                                    | 1.07(1.01,1.14) per 7.5 ug/m <sup>3</sup>   | 1.09 (1.01-1.17)  |

|                        |                                                                                  |                         |           |                       |                   |                                      |                         |                                               |                  |
|------------------------|----------------------------------------------------------------------------------|-------------------------|-----------|-----------------------|-------------------|--------------------------------------|-------------------------|-----------------------------------------------|------------------|
|                        |                                                                                  |                         |           |                       | Noise             | 57.0 (49.0–70.6)                     | NO <sub>2</sub>         | 1.08(1.00,1.16)<br>per 9.9 dB                 | 1.07 (1.00-1.14) |
| Downward et al. (2018) | The Dutch arm of this study (EPIC-NL), the Netherlands, 1993-2010, N=33,831      | ICD-10: I50             | 2009      | 1-year (2009)         | PM <sub>2.5</sub> | 17 (SD: 0.56; min: 15.4; max: 20.95) | -                       | 0.44 (0.16-1.20)<br>per 5 µg/m <sup>3</sup>   | 0.43 (0.16-1.20) |
|                        |                                                                                  |                         |           |                       | NO <sub>2</sub>   | 25 (SD: 6; min: 13; max: 62)         | -                       | 1.22 (1.01-1.48)<br>per 10 µg/m <sup>3</sup>  | 1.19 (1.00-1.40) |
| Bai et al. (2018)      | Ontario Population Health and Environment Cohort, Canada, 1996–2012, N=1,112,060 | ICD-9: 428; ICD-10: I50 | 1996–2012 | 3-year moving average | NO <sub>2</sub>   | 21.4 (SD: 3.5; min: 9.9; max: 21.1)  | PM <sub>2.5</sub>       | 1.05 (1.04-1.06)<br>per 4.0 ppb               | 1.13 (1.10-1.16) |
|                        |                                                                                  |                         |           |                       | Noise             | NA                                   | NO <sub>2</sub>         | 0.999 0.999-1.000                             | 0.99 (0.98-1.00) |
| Bai et al. (2019)      | Ontario Population Health and Environment Cohort, Canada, 2001-2015, N=5,062,146 | ICD-9: 428; ICD-10: I50 | 1998-2012 | 3-year moving average | PM <sub>2.5</sub> | 9.6 (SD: 2.8; min: 1.1; max: 20.0)   | -                       | 1.05 (1.04-1.05)<br>per 3.5 µg/m <sup>3</sup> | 1.07 (1.07-1.07) |
|                        |                                                                                  |                         |           |                       | NO <sub>2</sub>   | 18.3 (SD: 8.5; min: 2.7; max: 71.4)  | -                       | 1.02 (1.01-1.04)<br>per 13.9 ppb              | 1.01 (1.00-1.03) |
| Yazdi et al. (2019)    | Medicare beneficiary cohort, USA, 2000-2012, N=11,084,660                        | ICD-9: 428              | 2000-2012 | Annual mean           | PM <sub>2.5</sub> | ~12 (min: 7.5; max: 15)              | -                       | 1.053 (1.052–1.054) per 1 µg/m <sup>3</sup>   | 1.30 (1.30-1.31) |
| Bai et al. (2020)      | Ontario Population Health and Environment Cohort, Canada, 2001-2015, N=986,295   | ICD-9: 428; ICD-10: I50 | 2001-2015 | 3-year moving average | Noise             | 56.3 (SD: 7.1; min: 15; max: 85.3)   | UFP/<br>NO <sub>2</sub> | 1.07 (1.06-1.08)<br>per 10.7 dB               | 1.06 (1.05-1.07) |

§ PM<sub>2.5</sub>: particulate matter with a diameter < 2.5 µm (µg/m<sup>3</sup>); NO<sub>2</sub>: nitrogen dioxide (µg/m<sup>3</sup>); Noise: 24-hour weighted average road traffic noise level (dB)

† Mutual adjustment

¶ PM<sub>2.5</sub>: 5.1 µg/m<sup>3</sup>; NO<sub>2</sub>: 8.6 µg/m<sup>3</sup>; Noise: 9.3 dB

ICD-8, 9, or 10: International classification of disease, 8<sup>th</sup>, 9<sup>th</sup>, or 10<sup>th</sup> version

UFP: Ultrafine particle

**Figure S1. Number of participants in the study.**

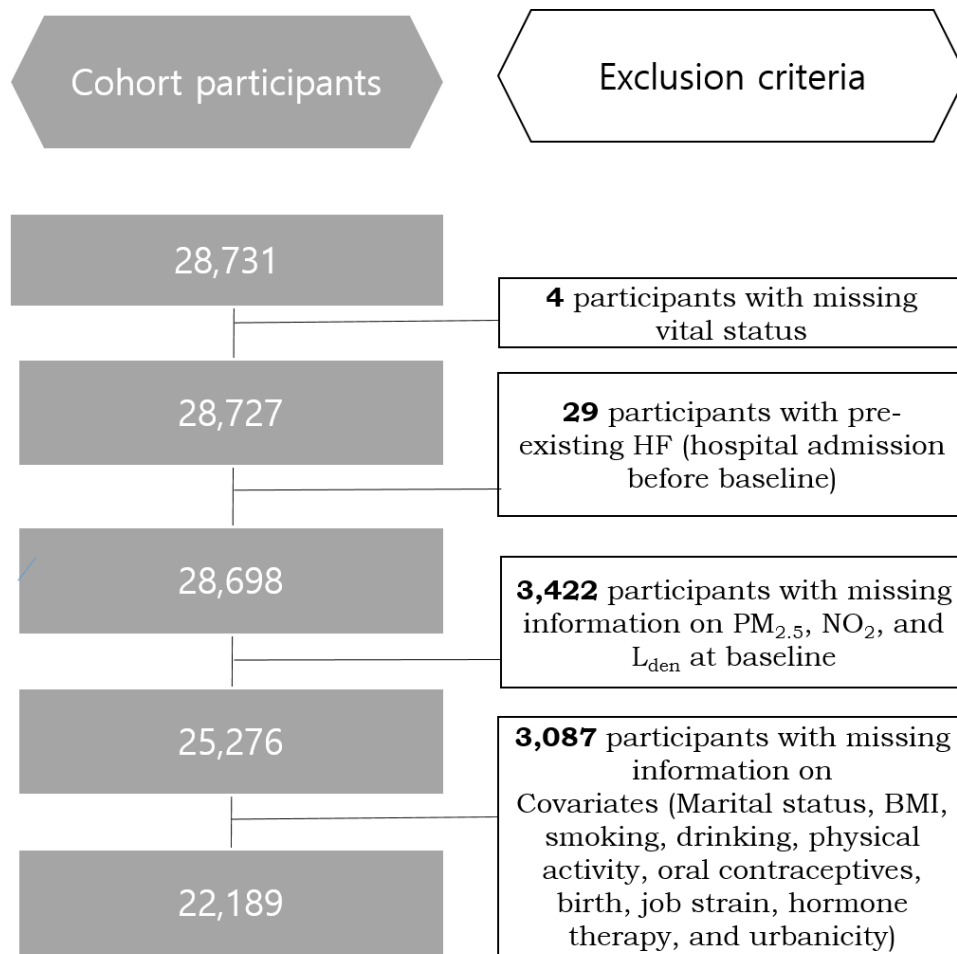

**Figure S2. Akaike Information Criteria to compare models.**

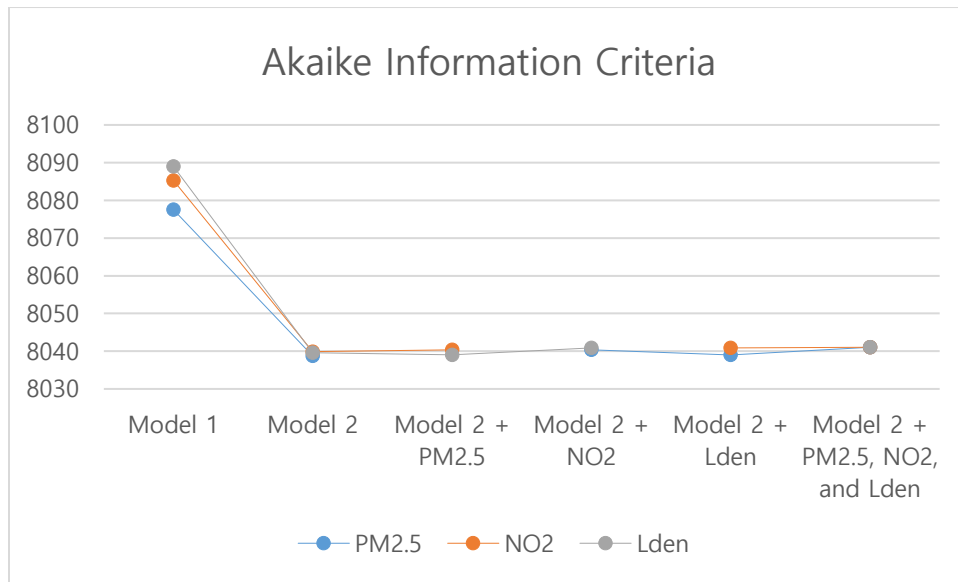

PM<sub>2.5</sub>: particulate matter with a diameter < 2.5 μm; NO<sub>2</sub>: nitrogen dioxide; L<sub>den</sub>: 24-hour weighted average road traffic noise level

Model 1 adjusting for age (underlying time) and a strata term of year of cohort entry (1993/1999)

Model 2 adjusting for individual- and area-level covariates in addition to the covariates in Model 1
